# Supplementary material for: Fungus-mediated biosynthesis of silica and titania particles
Source: Royal Society of Chemistry journal article supplement (doi:10.1039/b503008k), 2005-01-01
Supplement: b503008k.pdf [file b503008k.pdf]

**Supporting Information (S1)**

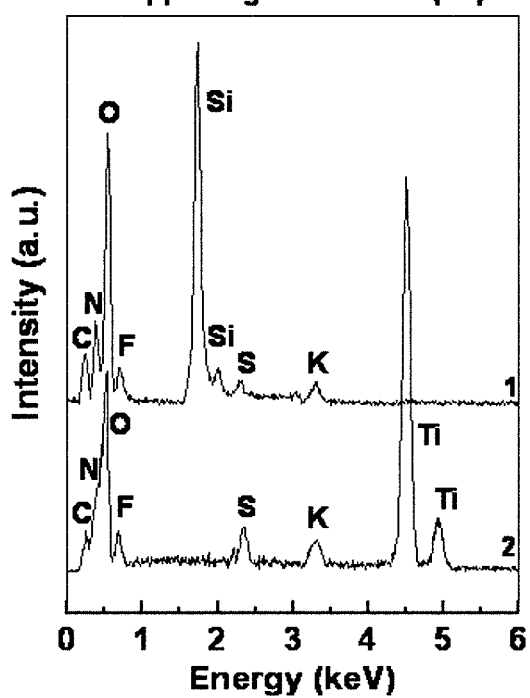

**S1.** EDAX spectra recorded from biogenic silica (curve 1) and titania (curve 2) particles synthesized using the fungus, *Fusarium oxysporum*.
